# Supplementary material for: Half-zirconocene anilide complexes: synthesis, characterization and catalytic properties for ethylene polymerization and copolymerization with 1-hexene
Source: Royal Society of Chemistry journal article supplement (doi:10.1039/c0dt01789b), 2011-01-01
Supplement: c0dt01789b.pdf [file c0dt01789b.pdf]

Supplementary Information

for

Half-zirconocene anilide complexes: synthesis, characterization and catalytic properties for ethylene polymerization and copolymerization with 1-hexene

Kefeng Liu, Qiaolin Wu, Wei Gao, Ying Mu\*

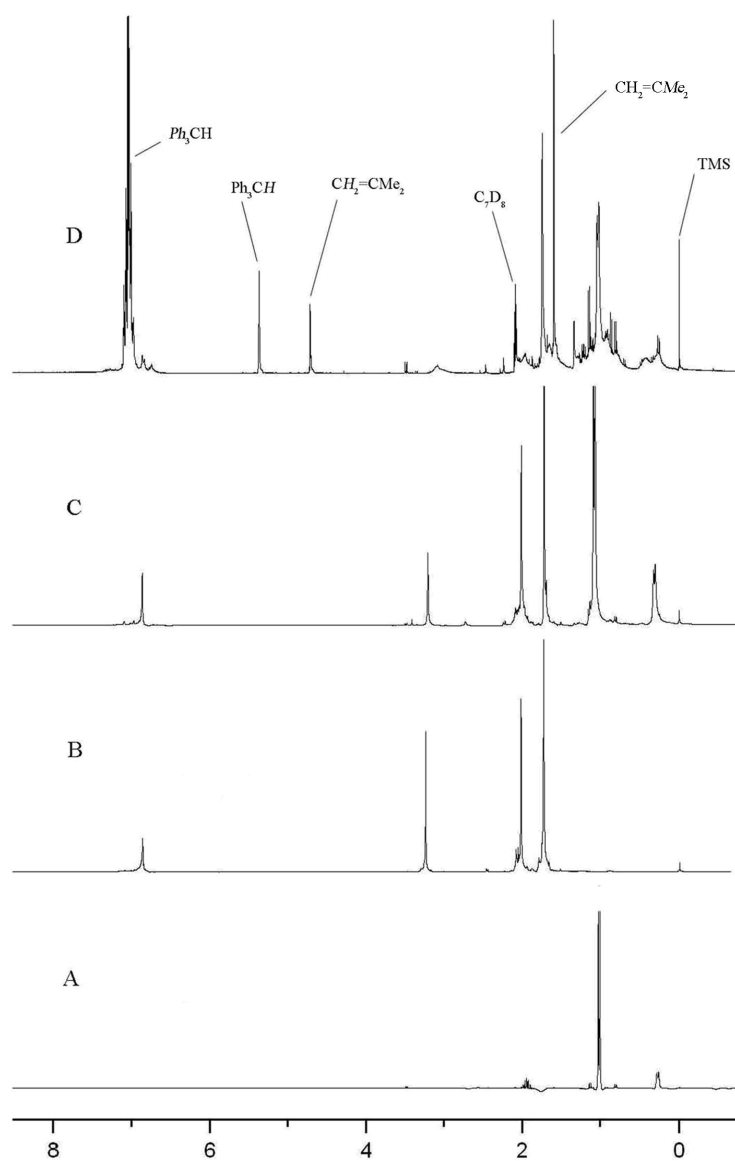

Fig. S1 <sup>1</sup>H NMR spectra of Al(iBu)<sub>3</sub> (A), complex 2 (B), complex 2/5 eq Al(iBu)<sub>3</sub> (C) and complex 2/5 eq Al(iBu)<sub>3</sub>/Ph<sub>3</sub>CB(C<sub>6</sub>F<sub>5</sub>)<sub>4</sub> (D) in C<sub>7</sub>D<sub>8</sub> at 25 °C.

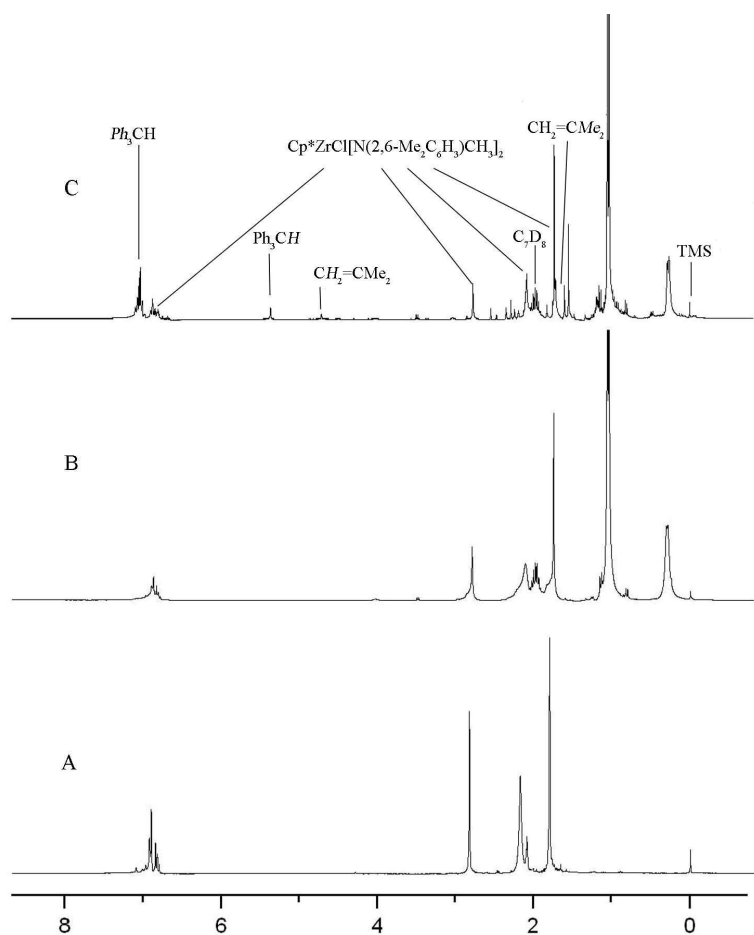

**Fig. S2**  $^1\text{H}$  NMR spectra of complex **4** (A), complex **4/5** eq  $\text{Al}^i\text{Bu}_3$  (B) and complex **4/5** eq  $\text{Al}^i\text{Bu}_3/\text{Ph}_3\text{CB}(\text{C}_6\text{F}_5)_4$  (C) in  $\text{C}_7\text{D}_8$  at  $25^\circ\text{C}$ .
